# Supplementary material for: Multimodal Analysis of Secondary Cerebellar Alterations After Pediatric Traumatic Brain Injury
Source: PubMed Central journal article supplement (PMC10652147; doi:10.1001/jamanetworkopen.2023.43410), 2023-11-15
Supplement: jamanetwopen-e2343410-s002.pdf [file jamanetwopen-e2343410-s002.pdf]

## **Data Sharing Statement**

### **Data**

**Data available:** No

### **Additional Information**

**Explanation for why data not available:** Some of our data come from international groups and thus require a data transfer agreement to share. Researchers are welcome to join our group and submit a proposal and sites can opt in to sharing data.
